1 **Title: Molecular and cellular similarities in the brain of SARS-CoV-2 and Alzheimer's**  
2 **disease individuals**

3

4 **Authors:** Elizabeth Griggs,<sup>1</sup> Kyle Trageser,<sup>1</sup> Sean Naughton,<sup>1</sup> Eun-Jeong Yang,<sup>1</sup> Brian Mathew,<sup>1</sup>  
5 Grace Van Hyfte,<sup>1</sup> Linh Hellmers,<sup>3</sup> Nathalie Jette,<sup>1</sup> Molly Estill,<sup>1</sup> Li Shen,<sup>1</sup> Tracy Fischer,<sup>3,4</sup>  
6 Giulio Maria Pasinetti<sup>1,2\*</sup>

7

8 **Affiliations:**

9 <sup>1</sup>Department of Neurology, Icahn School of Medicine at Mount Sinai, New York, New  
10 York, USA.

11 <sup>2</sup>Geriatric Research, Education and Clinical Center, James J. Peters Veterans Affairs  
12 Medical Center, Bronx, New York, USA.

13 <sup>3</sup>Tulane National Primate Research Center, Covington, Louisiana, USA.

14 <sup>4</sup>Department of Microbiology and Immunology, Tulane University School of Medicine,  
15 New Orleans, Louisiana, USA.

16

17 \*To whom correspondence should be addressed:

18 Giulio Maria Pasinetti, M.D., Ph.D.

19 Department of Neurology

20 The Mount Sinai School of Medicine

21 1 Gustave L. Levy Place, Box 1137

22 New York, NY 10029

23 Phone: (212) 241-7938

24 Fax: (212) 876-9042

25 Email: [giulio.pasinetti@mssm.edu](mailto:giulio.pasinetti@mssm.edu)

26        **Abstract**

27        Infection with the etiological agent of COVID-19, SARS-CoV-2, appears capable of  
28        impacting cognition, which some patients with Post-acute Sequelae of SARS-CoV-2  
29        (PASC). To evaluate neuro-pathophysiological consequences of SARS-CoV-2 infection,  
30        we examine transcriptional and cellular signatures in the Broadman area 9 (BA9) of the  
31        frontal cortex and the hippocampal formation (HF) in SARS-CoV-2, Alzheimer's disease  
32        (AD) and SARS-CoV-2 infected AD individuals, compared to age- and gender-matched  
33        neurological cases. Here we show similar alterations of neuroinflammation and blood-  
34        brain barrier integrity in SARS-CoV-2, AD, and SARS-CoV-2 infected AD individuals.  
35        Distribution of microglial changes reflected by the increase of Iba-1 reveal nodular  
36        morphological alterations in SARS-CoV-2 infected AD individuals. Similarly, HIF-1 $\alpha$  is  
37        significantly upregulated in the context of SARS-CoV-2 infection in the same brain  
38        regions regardless of AD status. The finding may help to inform decision-making  
39        regarding therapeutic treatments in patients with neuro-PASC, especially those at  
40        increased risk of developing AD.

41  
42        **Teaser**

43        SARS-CoV-2 and Alzheimer's disease share similar neuroinflammatory processes, which  
44        may help explain neuro-PASC.

45  
46  
47

## 48 **Introduction**

49 The consequences of SARS-CoV-2 infection have been well-studied in the respiratory  
50 system; however, much less information is available regarding the neurological  
51 consequences of infection (1). Previous evidence tentatively suggests that SARS-CoV-2  
52 may be neuroinvasive, leading to a vast array of neurological symptoms, including  
53 anosmia, ageusia, cognitive functions, and cerebrovascular disorders (2, 3). Neurological  
54 complications of SARS-CoV-2 infection manifest with increased severity related to age  
55 and shared medical history of metabolic disorders and other vascular risk factors (4–6).  
56 Some strains within the coronavirus family are implicated in neuronal degeneration such  
57 as HCoV-OC43, which can lead to glutamate excitotoxicity and neuronal degradation in  
58 mice through cytokine production (7, 8). Because SARS-CoV-2 is a new addition to the  
59 coronavirus family, little information exists regarding potential long-term neurological  
60 complications that may impact COVID-19 survivors. This may be especially concerning  
61 for aging individuals with increased vulnerability to developing age-related  
62 neurodegenerative disease.

63  
64 While it is currently unknown if neurological manifestations of SARS-CoV-2 infection  
65 arise solely from systemic inflammation in the periphery or brain infiltration, it is well  
66 established that secretion of cytokines and chemokines from the periphery allows the  
67 recruitment of leukocytes and other cells to specific tissues (9, 10). This type of immune  
68 response is speculated to accelerate blood-brain barrier (BBB) disruption and may  
69 potentially damage cells within the central nervous system (CNS) (11). Such effects are  
70 similar to neuropathology seen in Alzheimer’s disease (AD) and other neurodegenerative  
71 disorders, where leukocyte infiltration, BBB dysregulation, and microglial activation are  
72 observed. Thus, it is possible that SARS-CoV-2 may accelerate the onset and severity of

73 cognitive decline or AD in susceptible individuals (12, 13). Understanding the impact of  
74 SARS-CoV-2 infection on the CNS and subsequent mechanisms associated with cognition  
75 is particularly pressing, given the number of individuals presenting with neurological  
76 symptoms of post-acute sequelae of SARS-CoV-2 (neuro-PASC), colloquially termed  
77 ‘long-COVID’ (14, 15).

78  
79 Here, we investigate potential brain mechanisms associated with SARS-CoV-2 infection  
80 in SARS-CoV-2, AD and SARS-CoV-2 infected AD individuals by comparing  
81 transcriptional and cellular responses in the cortical Broadman area 9 (cortical BA9) of the  
82 frontal cortex and the hippocampal formation (HF); two brain regions deeply involved in  
83 cognitive and emotional functions, to age- and gender-matched neurological cases. Here  
84 we report evidence suggesting that SARS-CoV-2 infection promotes similar  
85 pathophysiological features found in AD cortical BA9 and HF regions and possibly  
86 exacerbate pre-existing AD pathophysiology.

## 87 88 **Results**

### 89 **Demographics of human postmortem cases**

90 We examined postmortem tissue samples of cortical Broadman area 9 (cortical BA9) of  
91 the frontal cortex and the hippocampal formation (HF) collected by the Neuropathology  
92 Brain Bank and Research CoRE at Mount Sinai from 4 different groups: SARS-CoV-2,  
93 AD, and AD individuals which became infected by SARS-CoV-2, compared to age- and  
94 gender-matched neurological cases (Table S1). Each group comprises an equal number of  
95 age-matched male and female patients, ensuring equal distribution with an average age of  
96 79.6 among groups. Medical records indicate that all AD individuals have postmortem  
97 ABC scores indicative of AD (Table S2), where A is a measure of amyloid beta

98 deposition, B is a measure of neurofibrillary degeneration based on the Braak and Brook  
99 score, and C is scored based on neuritic plaques outlined by the Consortium to Establish a  
100 Registry for Alzheimer's Disease diagnosis (CERAD) (16). SARS-CoV-2 infection was  
101 confirmed by diagnostic polymerase chain reaction (PCR). Within the SARS-CoV-2 and  
102 SARS-CoV-2 infected AD groups, all patients were symptomatic, admitted to the hospital,  
103 and received oxygen supplementation by ventilator or cannula with disease onset to death  
104 occurring on average, 27 days after diagnosis for patients with SARS-CoV-2 only and 32  
105 days after diagnosis in infected AD patients (Table S1 and S2). Blood specimens were  
106 collected and indicate several laboratory features of severe COVID-19 (Table S2), such as  
107 increased C-reactive protein (CRP) and interleukin-6 (IL-6) (17).

### 108 109 **Gene expression of SARS-CoV-2 and AD groups compared to control cases in** 110 **cortical BA9 and HF tissues**

111 The transcriptional profiles of AD and SARS-COV-2 infected postmortem cases from the  
112 cortical BA9 were assessed by pairwise comparison to determine gene expression  
113 compared to neurological control cases (**Fig. 1A-C**). Volcano plot distributions of gene  
114 transcripts of SARS-CoV-2 and AD cases compared to neurological controls (**Fig. 1A, B**)  
115 both reveal 39,901 genes which were used to determine differentially expressed genes  
116 based on a nominal p-value less than 0.01 and an absolute log fold-change (logFC) greater  
117 than 1. We find in the AD group, 287 genes are upregulated, and 131 genes are  
118 downregulated. In the SARS-CoV-2 group, 179 genes are upregulated, and 426 genes are  
119 downregulated. The Volcano plot distribution of gene transcripts of SARS-CoV-2 infected  
120 AD cases compared to neurological controls (**Fig. 1C**) revealed from 38,021 genes, and  
121 show 813 genes upregulated, 611 genes downregulated using the same cutoff for  
122 significance as in (**Fig. 1A, B**).

123

124 Transcriptional profiles of AD and SARS-COV-2 cases from the HF were assessed  
125 ( $p < 0.01$  and  $\log_{2}FC > 1$ ) to determine gene expression, as compared to neurological control  
126 cases (**Fig. 1D-F**), using 39,901 genes for SARS-CoV-2 and AD cases (**Fig. 1D, E**), and  
127 35,527 genes for the SARS-CoV-2 infected AD cases (**Fig. 1F**). We find in the AD group,  
128 304 genes upregulated, 214 genes downregulated. In the SARS-CoV-2 group, 230 genes  
129 are upregulated, and 464 genes are downregulated. Additionally, in the SARS-CoV-2  
130 infected AD group 466 genes upregulated, 582 genes downregulated.

131

### 132 **Similarity of gene expression in cortical BA9 and HF regions**

133 In order to determine the relative similarity of gene expression changes induced by disease  
134 state, a collection of genes known to be differentially expressed due to either SARS-CoV-  
135 2 infection or AD were examined across three individual differential comparisons (**Fig.**  
136 **2A, 2B**). While all three comparisons (AD versus Control, SARS-CoV-2 versus Control,  
137 and SARS-CoV-2 infected AD versus Control) showed generally the same trends, the AD  
138 and SARS-CoV-2 infected AD comparisons were strikingly similar, in both BA9 (**Fig.**  
139 **2A**) and HF (**Fig. 2B**).

140

141 Rank-rank hypergeometric overlap (RRHO) analysis comparing SARS-CoV-2 and AD  
142 cases also reveals a positive correlation between the AD and SARS-CoV-2 groups in the  
143 cortical BA9 (Fig. S1) as well as in the HF (Fig. S2), although to a lesser extent than in the  
144 cortical BA9. We then filtered genes using Ingenuity Pathway Analysis software (IPA) to  
145 determine the number of shared differentially regulated genes among the SARS-CoV-2,  
146 AD, and SARS-CoV-2 infected AD groups within each tissue region ( $p < 0.05$  and absolute  
147  $z > 0.0001$ ). Comparing these shared genes within the cortical BA9, we find that SARS-

148 CoV-2, AD and SARS-CoV-2 infected AD individuals shared 410 upregulated genes, 269  
149 downregulated genes from 679 expressed genes (**Fig. 2C**; Data S1). In the HF we found  
150 the three groups share 211 upregulated genes, 148 downregulated genes from 359  
151 differentially expressed genes (**Fig. 2D**; Data S2).

### 152 **Pathway activation of SARS-CoV-2 and AD groups**

153 IPA was employed to further characterize pathways in SARS-CoV-2, AD and SARS-  
154 CoV-2 infected AD groups compared to the neurological controls. Within the cortical  
155 BA9 region (**Fig. 3A**), for example several pathways such as neuroinflammation, TREM1,  
156 and cell senescence show increased activation in the SARS-CoV-2, AD and SARS-CoV-2  
157 infected AD groups. TREM1 signaling, the most highly activated pathway in this dataset  
158 (**Fig. 3A, B**), is expressed primarily on myeloid cells, such as macrophages and microglia,  
159 and is involved in pro-inflammatory immune responses (18). Although cellular  
160 senescence due to age is a natural process where telomeres shorten over time, this process  
161 also occurs during cellular stress due to inflammation, including from viral infections,  
162 leading to a senescence-associated secretory phenotype (SASP) such as metalloproteinases  
163 (MMP's), and inflammatory cytokines (19, 20) (**Fig. 3A**). Another pathway of interest,  
164 SNARE, shows decreased activation in AD and SARS-CoV-2 groups (**Fig. 3A**), with the  
165 most significant reduction seen in the SARS-CoV-2 infected AD cases group. SNARE  
166 proteins play an essential role in neurotransmitter release, and altered function is  
167 implicated in the pathophysiology of neurodegenerative diseases such as AD, where  
168 SNARE proteins affect  $\beta$ -amyloid ( $A\beta$ ) accumulation and cytoplasmic transport of  
169 neurofibrillary tangles (21).

172 Within the HF (**Fig. 4A**), for example interleukin-8 (IL-8) another neuroinflammatory  
173 pathway, and ciliary neurotrophic factor (CNTF) signaling is upregulated in SARS-CoV-  
174 2, AD and SARS-CoV-2 infected AD groups, while cAMP response element-binding  
175 protein (CREB) is also upregulated in SARS-CoV-2 groups but downregulated in AD-  
176 only (**Fig. 4A**). IL-8 has several important roles, including endothelial cell migration and  
177 chemoattraction of neutrophils (22). One way IL-8 aids cell migration is by enhancing the  
178 expression of molecules such as MMP-2, MMP-9, involved in BBB integrity and  
179 induction of neuronal apoptosis, and VEGF-A, involved in vascular permeability and  
180 angiogenesis, thus having a potential effect on vascular damage (23–25). CNTF signaling  
181 aids in the prevention of neuronal degeneration after injury and is neuroprotective in  
182 diseases such as multiple sclerosis (MS) and amyotrophic lateral sclerosis (ALS) (26).  
183 Interestingly, CREB signaling modulates processes in consolidating memory and  
184 information processing and is inhibited in AD (27). Consistent with these findings, we  
185 also see a reduction in CREB signaling in the AD individuals; however, this effect is  
186 reversed in SARS-CoV-2 infected AD individuals in the HF. It is important to note that  
187 TREM1 signaling is upregulated in two of the three sample groups (SARS-CoV-2 and  
188 SARS-CoV-2 infected AD cases), but no predictions for this pathway occurs in the AD  
189 group. As such, this pathway is not included in the analysis within the HF (**Fig 4A,B**).

190  
191 Additionally, upregulation of integrin signaling and nerve growth factor (NGF) signaling  
192 occur in both cortical BA9 and HF tissue (**Fig's. 3B and B4**) in all SARS-CoV-2, AD and  
193 SARS-CoV-2 infected AD groups. Neuronal function shown by the upregulation of NGF  
194 signaling is critical for the survival of neurons, and alterations of NGF signaling has been  
195 implicated in neurodegenerative disorders such as AD (28). Integrin signaling is used for a



196 diverse array of functions within the CNS via cell-to-cell and cell-to-extracellular matrix  
197 interactions (29).

### 198 199 **Regulation of inflammatory microglia responses in cortical BA9 and HF sections**

200 Region-matched formalin-fixed paraffin-embedded (FFPE) tissue from the contralateral  
201 hemisphere of cortical BA9 and HF used for transcriptional studies underwent  
202 immunohistochemical (IHC) analysis for evidence of microglial activation (Iba-1), the  
203 presence of SARS-CoV-2 (SARS-CoV-2 nucleocapsid), and vascular integrity, assessed  
204 via hypoxia-inducible factor-1 $\alpha$  subunit (HIF-1 $\alpha$ ).

205  
206 Neuroinflammation was assessed with a pan-microglia marker, Iba-1, which is  
207 upregulated by microglia in the context of inflammation and reveals morphological  
208 alterations associated with their activation state (**Fig. 5**). Compared to neurological  
209 controls, microglia in AD, SARS-CoV-2, and SARS-CoV-2 infected AD cases are more  
210 numerous and display an activated phenotype, with retracted, thickened processes and  
211 enlarged somas (**Fig. 5 A-D**). Microglia also appear to accumulate around blood vessels in  
212 the context of AD and SARS-CoV-2 groups but not in unaffected neurological controls  
213 brain (**Fig. 5 E-H**), suggesting factors at the level of the BBB may participate in  
214 microglial activation. Microglial nodules, which are commonly observed in  
215 neuroinflammatory disease, were seen in all conditions but appeared larger and more  
216 frequently in infection, as compared to AD-only and controls (**Fig. 5 I-L**). When  
217 detectable, SARS-CoV-2 appears to be restricted to the endothelium (**Fig. 5 G, H, K, L**)  
218 and did not colocalize with Iba-1 or glial fibrillary acidic protein (GFAP; data not shown),  
219 suggesting neither microglia nor astrocytes harbor productive virus. Nonbiased  
220 quantitation revealed an overall increase in the number of microglia in the HF and cortical

221 BA9 of patients with AD, SARS-CoV-2, and SARS-CoV-2 infected AD cases. A  
222 statistically significant increase in the number of microglia occurs in AD alone in the HF  
223 and SARS-CoV-2 infected AD cases in both the HF and cortical BA9 (**Fig. 5**). An  
224 increase in the frequency of nodular lesions was seen with SARS-CoV-2 infection, with  
225 and without AD, in both brain regions assessed. However, a statistically significant  
226 increase in nodular lesions are present in SARS-CoV-2 infected AD cases (**Fig. 5P-R**).

### 227 228 **Regulation of vascular damage using hypoxia inducible factor- 1 $\alpha$ (HIF-1 $\alpha$ ) detection**

229 Tissues were further assessed for possible hypoxia by IHC using an antibody against the  $\alpha$   
230 subunit of HIF-1, which is stabilized under hypoxic conditions. Upregulation and  
231 stabilization of HIF-1 $\alpha$  is most pronounced in the context of SARS-CoV-2 infection,  
232 regardless of AD status in cortical BA9 (**Fig. 6A-D**) and HF (**Fig. 6E-H**). Nonbiased area  
233 positivity quantitation revealed HIF-1 $\alpha$  is only slightly elevated in cortical BA9 of AD  
234 patients, as compared to age-matched neurological controls (**Fig. 6J**). In contrast, a greater  
235 increase occurs in the HF from SARS-CoV-2 individuals, with and without AD. SARS-  
236 CoV-2 only samples showed a significant increase in HIF-1 $\alpha$  of cortical BA9 when  
237 compared to controls (**Fig. 6I-K**).

### 238 239 **Discussion**

240 The finding from our study suggests that SARS-CoV-2 and AD infected individuals  
241 share similar alterations of regulatory patterns of immune-inflammatory pathways and  
242 pathways involved with cognition as suggested by recent meta-analyses showing shared  
243 neuroinflammation and microvascular injury, in particular AD and SARS-CoV-2  
244 infected individuals (30). Additionally, Zhou and colleagues found a significant overlap  
245 in cerebrospinal fluid (CSF) monocytes and markers in AD and COVID-19, which also

246 occurs in our dataset (30). The similarities of transcriptional profiles and cellular  
247 pathophysiology in SARS-CoV-2 and SARS-CoV-2 infected individuals support the  
248 potential role of SARS-CoV-2 infection on the CNS, leading to neuro-PASC symptoms  
249 such as brain fog and memory loss.

250  
251 Notably, our study identifies similar neuroinflammatory profiles in SARS-CoV-2, AD and  
252 AD SARS-CoV-2 infected individuals at the transcriptional and cellular levels in both the  
253 cortical BA9 and HF brain regions. This suggests that SARS-CoV-2 generates a similar  
254 neuroinflammatory environment in neurodegenerative disorders like AD. This was  
255 highlighted by the regulation of TREM1, neuroinflammation, and cellular  
256 senescence/inflammatory pathways present in all groups and further established by the  
257 widespread microglial activation seen in AD and SARS-CoV-2 infected AD cases, and in  
258 particular, the nodular formation seen in SARS-CoV-2 infected AD cases. Microglia  
259 nodule formation is present in some neurodegenerative diseases, such as MS, and viral  
260 infections, such as herpes simplex virus (HSV) and human immunodeficiency virus (HIV)  
261 (31, 32). A potentially compounding finding is the nodular formation that is initially  
262 characterized by abundant presence of activated microglia and innate immune factors  
263 leading to toll-like receptor (TLR) signaling and upregulations of inflammasome genes,  
264 leading to T cell stimulation and ultimately the destruction of neurons (31). This may be  
265 of particular concern in the SARS-CoV-2 infected AD cases, where we primarily observe  
266 increased nodular lesions. This suggests SARS-CoV-2 further promotes  
267 neuroinflammation in AD, which likely advances the progression and severity of CNS  
268 disease in these individuals. Interestingly, a large retrospective study of patients 65 years  
269 or older revealed that patients with SARS-CoV-2 were at an increased risk for a new AD  
270 diagnosis within a year of their SARS-CoV-2 diagnosis, with the most significant risk

271 seen among those 85 years and older (33). This may underscore the critical role of  
272 preexisting inflammation in the brain, which is seen in the context of ‘normal’ aging, in  
273 promoting or advancing AD progression.

274  
275 Our findings also support the notion that SARS-CoV-2 may cause cognitive deficits via  
276 regulation of pathways associated with cognition and neuroinflammation. Here, we show  
277 changes in the transcriptional regulation of SNARE and NGF pathways, suggesting  
278 impaired neuronal health and function, presumably negatively impacting cognitive  
279 function. We also observed potential damage to the vasculature via increased regulation of  
280 HIF-1 $\alpha$ , integrin signaling, and IL-8 signaling. It is important to note a possibility of  
281 vascular damage due to ventilation prior to death in SARS-CoV-2 infected individuals;  
282 however, vascular damage by SARS-CoV-2, as assessed by HIF-1 $\alpha$ , is observed in non-  
283 human primates that were euthanized at designated end-of-life time points precluding  
284 breathing intervention (34). These findings may point to a possible route for lymphocyte  
285 transmigration following chemoattractant gradients such as IL-8 and enhancement of  
286 MMPs and VEGF, which are aided by integrins such as cellular adhesion molecules such  
287 as ICAM-1 and are implicated with inflammatory signal transduction (35, 36). This  
288 process leads to T cell activation, which may be responsible for the observed  
289 inflammatory environment. Our transcriptional data showed an abundant upregulation of  
290 TLRs (TLRs 1, 5, 7, and 8) related to the inflammasome. Further analysis of this dataset  
291 also indicated the potential role for T cells through IL-7 pathway activation and CD86  
292 upregulation; however, we did not confirm changes in the number of T cells, and no  
293 evidence of leukocyte infiltration into the CNS compartment was observed in any disease  
294 state in this investigation. Future studies will be required to determine the role of  
295 leukocytes in the observed pathophysiology.

296

297 Although neuroinflammation and vascular injury were prominent features of SARS-CoV-  
298 2 and SARS-CoV-2 infected AD cases brain pathology, the direct role of the virus is  
299 unclear. We did detect SARS-CoV-2 nucleocapsid in some SARS-CoV-2 brain tissues  
300 that appear to be restricted to the vasculature. This finding is supported by other studies  
301 suggesting SARS-CoV-2 is sporadically present in brain tissue (37). Importantly, we only  
302 investigated CNS regions with the greatest significance in AD. These regions may be less  
303 prone to SARS-CoV-2 infection than others, such as the olfactory bulb and tract, where  
304 olfactory neurons are proposed to be infected through viral spread from olfactory  
305 epithelium (38). Our findings of the viral nucleocapsid limited to the endothelium suggest  
306 the hematological spread of SARS-CoV-2 to the CNS that may not extend to the neurons  
307 in the cortical BA9 and HF yet is still capable of inducing widespread inflammation in the  
308 brain.

309

310 Even in the absence of a detectable virus in the neurons or neural cells, SARS-CoV-2  
311 may impact cognitive dysfunction through TREM1 activation of the NLRP3  
312 inflammasome and subsequent pyroptosis, where pro-caspase 1 cleavage and subsequent  
313 cleavage and activation of IL-1 $\beta$ , IL-18 and gasmerdin D pore formation in cells  
314 ultimately leading to pyroptosis (39, 40). NLRP3 activation is reported in AD and  
315 COVID-19, and is suggested by formation of microglial nodules demonstrated in these  
316 cases (41–43).

317

318 SARS-CoV-2 is not the first virus to be implicated in cognitive dysfunction. This is a facet  
319 shown with other viruses such as HIV, HSV, and Epstein-Barr virus (EBV) (44, 45).

320

While this study cannot predict the outcome of disease progression in COVID-19

321 survivors, the present findings that SARS-CoV-2 infection can recapitulate AD-type  
322 transcriptional and cellular neuroinflammatory patterns among other in a very short time  
323 frame makes it critical to understand how SARS-CoV-2 impacts long-term cognition. The  
324 increase in nodular formation present in SARS-CoV-2 infected AD cases tissue also  
325 demonstrates a critical need to functionally determine potentially synergistic effects of AD  
326 and SARS-CoV-2. This is underscored by the prevalence of cognitive dysfunction seen  
327 among neuro-PASC patients, making it imperative that the link between SARS-CoV-2  
328 and cognition be intensively investigated to identify potential therapeutic strategies for  
329 halting cognitive decline in these individuals. Collectively, our results demonstrate several  
330 key areas of overlap between the neurological effects of SARS-CoV-2 infection and AD.  
331 These findings may help inform decision-making regarding therapeutic treatments in  
332 patients with COVID-19, especially those who may be at increased risk of developing AD.

333

## 334 **Materials and Methods**

### 335 **Patients**

336 Brain tissue was collected from the cortical BA9 region (cortical BA9) and hippocampal  
337 formation (HF) of four SARS-CoV-2 cases, four Alzheimer's disease (AD) cases and four  
338 non-SARS-CoV-2 or AD autopsies. With each case, one hemisphere of the brain was  
339 formalin-fixed paraffin-embedded (FFPE) and the other hemisphere was frozen to  
340 generate fresh-frozen blocks. FFPE tissue was used for microscopy and region matched  
341 fresh-frozen tissue was used for sequencing.

342 Tissue was collected in accordance with IRB-approved guidelines and regulations by the  
343 Brain Bank at Mount Sinai, and clinical data including cardiovascular and neurological  
344 conditions were collected by the Department of Neurology.

345

## 346 **RNA sequencing**

347 Samples collected and homogenized in RNazol RT (Molecular Research Center, Inc.)  
348 were then processed using the Zymo Clean and concentrator Kit (Zymo Research) to  
349 collect total RNA following the manufacturers protocols. cDNA library construction and  
350 sequencing were conducted by Genewiz (Azenta Life Sciences). Total RNA samples were  
351 quantified using Qubit 2.0 Fluorometer (Life Technologies, Carlsbad, CA, USA) and  
352 RNA integrity was checked with 4200 TapeStation (Agilent Technologies, Palo Alto, CA,  
353 USA).

354  
355 Samples were treated with TURBO DNase (Thermo Fisher Scientific, Waltham, MA,  
356 USA) to remove DNA contaminants, followed by rRNA depletion using QIAseq®  
357 FastSelect™-rRNA HMR kit (Qiagen, Germantown, MD, USA ); conducted following  
358 the manufacturer's protocol. RNA sequencing libraries were constructed with the  
359 NEBNext Ultra II RNA Library Preparation Kit for Illumina by following the  
360 manufacturer's recommendations, where enriched RNAs were fragmented for 15 minutes  
361 at 94 °C. First strand and second strand cDNA are subsequently synthesized. cDNA  
362 fragments are end repaired and adenylated at 3'ends, and universal adapters are ligated to  
363 cDNA fragments, followed by index addition and library enrichment with limited cycle  
364 PCR. Sequencing libraries were validated using the Agilent TapeStation 4200 (Agilent  
365 Technologies, Palo Alto, CA, USA), and quantified using Qubit 2.0 Fluorometer  
366 (ThermoFisher Scientific, Waltham, MA, USA) as well as by quantitative PCR (KAPA  
367 Biosystems, Wilmington, MA, USA). The sequencing libraries were multiplexed and  
368 clustered on one lane of a flowcell. After clustering, the flowcell was loaded on the  
369 Illumina HiSeq 4000 instrument according to manufacturer's instructions. The samples  
370 were sequenced using a 2x150 Pair-End (PE) configuration.

371

Image analysis and base calling were conducted by the HiSeq Control Software (HCS).

372

373

Raw sequence data (.bcl files) generated from Illumina HiSeq was converted into FASTQ

374

files and de-multiplexed using Illumina's bcl2fastq 2.17 software. One mismatch was

375

allowed for index sequence identification. After investigating the quality of the raw data,

376

sequence reads were trimmed to remove possible adapter sequences and nucleotides with

377

poor quality using Trimmomatic v.0.36. The trimmed reads were mapped to the GRCh38

378

reference genome available on ENSEMBL using the STAR aligner v.2.5.2b. BAM files

379

were generated as a result of this step. Unique gene hit counts were calculated by using

380

feature Counts from the Subread package v.1.5.2. Only unique reads that fell within exon

381

regions were counted.

382

383

### **Immunohistochemistry**

384

Tissue was cut at 6  $\mu$ m on a Leica Microtome to for immunohistochemistry that was

385

performed formalin-fixed paraffin-embedded (FFPE) brain sections as previously

386

described (46) (Iba-1 staining was conducted on a Ventana Benchmark using OptiView

387

and UltraView detection kits provided by Roche (Roche Molecular Systems, Inc).

388

Sections were deparaffinized in xylene and rehydrated through an ethanol series ending in

389

distilled water. Heat-mediated antigen retrieval was carried out in a vacuum oven with

390

Tris-EDTA buffer (10mM Trizma base, 1mM EDTA, 0.05% Tween 20, pH 9.0) or

391

sodium citrate buffer (10mM sodium citrate, 0.05% Tween 20, pH 6.0). All washes were

392

performed using tris buffered saline containing Tween 20 (TTBS; 0.1M Trizma base,

393

0.15M NaCl, 0.1% Tween 20, pH 7.4). Following antigen retrieval, tissues were blocked

394

with 20% normal horse serum. Titrated primary antibodies included anti-HIF-1 $\alpha$  (mouse

395

mgc3, 1:400, Abcam, ab16066). Tissues were incubated with primary antibody overnight



396 at room temperature and detected using the appropriate biotinylated secondary antibody  
397 (1:200, Vector Labs, BA-1100, BA-2000) and alkaline phosphatase-Vector Red according  
398 to manufacturer instructions (Vector Labs). Tissues were counterstained with Mayer's  
399 hematoxylin and coverslipped.

400

### 401 **Imaging and quantitation**

402 Slides were scanned with the Axio Scan.Z1 digital slide scanner (Zeiss). Brightfield  
403 images were acquired using HALO (Indica Labs, v3.4.2986.151). Figures were created in  
404 Photoshop (Adobe, v23.5.1) by brightness and contrast adjustments applied to the entire  
405 image.

406

407 Threshold and multiplex analyses were performed with HALO algorithms for non-biased  
408 quantitation of proteins of interest without processing, as described previously (38). For  
409 microglia quantitation, hematoxylin-stained nuclei were used to quantify the total number  
410 of cells and those with Vector Red intensity above a rigorous threshold (Iba-1+).

411 Microglia frequency is reported as the percentage of total nuclei in the tissue section  
412 assessed. To assess frequency of nodular lesions, all Iba-1-stained tissues were viewed in  
413 HALO and nodular lesions made up of 3 or more Iba-1+ microglia in contact with one  
414 another were counted as a single nodule. The total number of nodules for each tissue is  
415 reported per tissue area. Quantitation of HIF-1 $\alpha$  was performed using an area  
416 quantification algorithm for Vector Red intensity. Annotations were drawn to outline the  
417 tissue and exclude empty spaces and glass. The annotated area was analyzed for overall  
418 quantity of Vector Red positivity per micron<sup>2</sup> of tissue. Two-tailed Mann-Whitney U tests  
419 were performed with GraphPad Prism software, v9.3.1. Data are expressed as mean  $\pm$   
420 SEM. P values  $\leq 0.05$  are considered significant.

421

## 422 **Bioinformatics Data Access and Analysis**

423 Sample similarity was assessed with PCA analysis on VST-transformed expression values.

424 Genes were filtered to remove lowly expressed genes, defined as fewer than 5 samples

425 showing a minimum read count of 1 read, prior to performing differential analysis with

426 DESeq2, in R (4.2.0) (47). The transcriptional profiles of SARS-CoV-2 and AD

427 postmortem cases from the cortical BA9 and HF were assessed by pairwise comparison to

428 the neurologically healthy control cases. Genes were assigned as differentially expressed

429 if the nominal p-value was less than 0.05 and the absolute log<sub>2</sub>FC exceeded 1. An

430 additional round of differential expression testing was performed using a model containing

431 covariates (COVID status, Alzheimer's status, gender, and brain region), to extract the

432 transcriptional effects of the individual covariates. Biological pathways and key regulators

433 impacted by disease were identified using QIAGEN Ingenuity Pathway Analysis (IPA)

434 (QIAGEN Inc., Version 73620684) (48) Genes with a threshold of  $p < 0.05$  were used as

435 input for IPA. The relative similarities of transcriptional changes in the DESeq2

436 comparisons were assessed using Rank-rank hypergeometric overlap (RRHO2) analysis.

437

438

439 **References**

- 440 1. T. Flerlage, D. F. Boyd, V. Meliopoulos, P. G. Thomas, S. Schultz-Cherry, Influenza virus  
441 and SARS-CoV-2: pathogenesis and host responses in the respiratory tract. *Nat Rev*  
442 *Microbiol.* **19**, 425–441 (2021).
- 443 2. M. Desforges, A. Le Coupanec, J. K. Stodola, M. Meessen-Pinard, P. J. Talbot, Human  
444 coronaviruses: viral and cellular factors involved in neuroinvasiveness and  
445 neuropathogenesis. *Virus Res.* **194**, 145–158 (2014).
- 446 3. K. S. Hingorani, S. Bhadola, A. M. Cervantes-Arslanian, COVID-19 and the Brain. *Trends*  
447 *in Cardiovascular Medicine* (2022), doi:10.1016/j.tcm.2022.04.004.
- 448 4. A. A. Divani, S. Andalib, J. Biller, M. Di Napoli, N. Moghimi, C. A. Rubinos, C. O.  
449 Nobleza, P. N. Sylaja, M. Toledano, S. Lattanzi, L. D. McCullough, S. Cruz-Flores, M.  
450 Torbey, M. R. Azarpazhooh, Central Nervous System Manifestations Associated with  
451 COVID-19. *Curr Neurol Neurosci Rep.* **20**, 60 (2020).
- 452 5. S. H.-Y. Chou, E. Beghi, R. Helbok, E. Moro, J. Sampson, V. Altamirano, S. Mainali, C.  
453 Bassetti, J. I. Suarez, M. McNett, GCS-NeuroCOVID Consortium and ENERGY  
454 Consortium, Global Incidence of Neurological Manifestations Among Patients Hospitalized  
455 With COVID-19—A Report for the GCS-NeuroCOVID Consortium and the ENERGY  
456 Consortium. *JAMA Network Open.* **4**, e2112131 (2021).
- 457 6. B. N. Sullivan, T. Fischer, Age-Associated Neurological Complications of COVID-19: A  
458 Systematic Review and Meta-Analysis. *Frontiers in Aging Neuroscience.* **13** (2021)  
459 (available at <https://www.frontiersin.org/articles/10.3389/fnagi.2021.653694>).

- 460 7. H. Jacomy, J. R. St-Jean, É. Brison, G. Marceau, M. Desforges, P. J. Talbot, Mutations in  
461 the spike glycoprotein of human coronavirus OC43 modulate disease in BALB/c mice from  
462 encephalitis to flaccid paralysis and demyelination. *J Neurovirol.* **16**, 279–293 (2010).
- 463 8. E. Brison, H. Jacomy, M. Desforges, P. J. Talbot, Glutamate Excitotoxicity Is Involved in  
464 the Induction of Paralysis in Mice after Infection by a Human Coronavirus with a Single  
465 Point Mutation in Its Spike Protein. *Journal of Virology.* **85**, 12464–12473 (2011).
- 466 9. L. Bauer, B. M. Laksono, F. M. S. de Vrij, S. A. Kushner, O. Harschnitz, D. van Riel, The  
467 neuroinvasiveness, neurotropism, and neurovirulence of SARS-CoV-2. *Trends in*  
468 *Neurosciences.* **45**, 358–368 (2022).
- 469 10. M. Prinz, J. Priller, The role of peripheral immune cells in the CNS in steady state and  
470 disease. *Nat Neurosci.* **20**, 136–144 (2017).
- 471 11. G. A. de Erausquin, H. Snyder, M. Carrillo, A. A. Hosseini, T. S. Brugha, S. Seshadri, CNS  
472 SARS-CoV-2 Consortium, The chronic neuropsychiatric sequelae of COVID-19: The need  
473 for a prospective study of viral impact on brain functioning. *Alzheimers Dement.* **17**, 1056–  
474 1065 (2021).
- 475 12. J. Meinhardt, J. Radke, C. Dittmayer, J. Franz, C. Thomas, R. Mothes, M. Laue, J.  
476 Schneider, S. Brünink, S. Greuel, M. Lehmann, O. Hassan, T. Aschman, E. Schumann, R. L.  
477 Chua, C. Conrad, R. Eils, W. Stenzel, M. Windgassen, L. Rößler, H.-H. Goebel, H. R.  
478 Gelderblom, H. Martin, A. Nitsche, W. J. Schulz-Schaeffer, S. Hakrrouch, M. S. Winkler, B.  
479 Tampe, F. Scheibe, P. Körtvélyessy, D. Reinhold, B. Siegmund, A. A. Köhl, S. Elez Kurtaj,  
480 D. Horst, L. Oesterhelweg, M. Tsokos, B. Ingold-Heppner, C. Stadelmann, C. Drosten, V.  
481 M. Corman, H. Radbruch, F. L. Heppner, Olfactory transmucosal SARS-CoV-2 invasion as

- 482 a port of central nervous system entry in individuals with COVID-19. *Nat Neurosci.* **24**,  
483 168–175 (2021).
- 484 13. S. D. Mhatre, C. A. Tsai, A. J. Rubin, M. L. James, K. I. Andreasson, Microglial  
485 malfunction: the third rail in the development of Alzheimer’s disease. *Trends Neurosci.* **38**,  
486 621–636 (2015).
- 487 14. J. Shanley, A. Valenciano, G. Timmons, V. Kakarla, A. Miner, T. Rempe, J. Graves,  
488 Longitudinal Evaluation of Neuro-PASC Symptoms (S8.007). *Neurology.* **98** (2022)  
489 (available at [https://n.neurology.org/content/98/18\\_Supplement/732](https://n.neurology.org/content/98/18_Supplement/732)).
- 490 15. H. E. Davis, G. S. Assaf, L. McCorkell, H. Wei, R. J. Low, Y. Re’em, S. Redfield, J. P.  
491 Austin, A. Akrami, Characterizing long COVID in an international cohort: 7 months of  
492 symptoms and their impact. *EClinicalMedicine.* **38**, 101019 (2021).
- 493 16. G. G. Kovacs, E. Gelpi, Clinical Neuropathology Practice News 3-2012: the “ABC” in  
494 AD – revised and updated guideline for the neuropathologic assessment of Alzheimer’s  
495 disease. *Clin Neuropathol.* **31**, 116–118 (2012).
- 496 17. M. Lampart, N. Zellweger, S. Bassetti, S. Tschudin-Sutter, K. M. Rentsch, M. Siegemund,  
497 R. Bingisser, S. Osswald, G. M. Kuster, R. Twerenbold, Clinical utility of inflammatory  
498 biomarkers in COVID-19 in direct comparison to other respiratory infections—A  
499 prospective cohort study. *PLOS ONE.* **17**, e0269005 (2022).
- 500 18. A. de Oliveira Matos, P. H. dos Santos Dantas, M. Figueira Marques Silva-Sales, H. Sales-  
501 Campos, The role of the triggering receptor expressed on myeloid cells-1 (TREM-1) in non-  
502 bacterial infections. *Critical Reviews in Microbiology.* **46**, 237–252 (2020).

- 503 19. S. Lee, Y. Yu, J. Trimpert, F. Benthani, M. Mairhofer, P. Richter-Pechanska, E. Wyler, D.  
504 Belenki, S. Kaltenbrunner, M. Pammer, L. Kausche, T. C. Firsching, K. Dietert, M.  
505 Schotsaert, C. Martínez-Romero, G. Singh, S. Kunz, D. Niemeyer, R. Ghanem, H. J. F.  
506 Salzer, C. Paar, M. Mülleder, M. Uccellini, E. G. Michaelis, A. Khan, A. Lau, M. Schönlein,  
507 A. Habringer, J. Tomasits, J. M. Adler, S. Kimeswenger, A. D. Gruber, W. Hoetzenecker, H.  
508 Steinkellner, B. Purfürst, R. Motz, F. Di Pierro, B. Lamprecht, N. Osterrieder, M.  
509 Landthaler, C. Drost, A. García-Sastre, R. Langer, M. Ralser, R. Eils, M. Reimann, D. N.  
510 Y. Fan, C. A. Schmitt, Virus-induced senescence is a driver and therapeutic target in  
511 COVID-19. *Nature*. **599**, 283–289 (2021).
- 512 20. J.-P. Coppé, P.-Y. Desprez, A. Krtolica, J. Campisi, The senescence-associated secretory  
513 phenotype: the dark side of tumor suppression. *Annu Rev Pathol*. **5**, 99–118 (2010).
- 514 21. A. Margiotta, Role of SNAREs in Neurodegenerative Diseases. *Cells*. **10**, 991 (2021).
- 515 22. A. Manda-Handzlik, U. Demkow, The Brain Entangled: The Contribution of Neutrophil  
516 Extracellular Traps to the Diseases of the Central Nervous System. *Cells*. **8**, 1477 (2019).
- 517 23. R. Lugano, M. Ramachandran, A. Dimberg, Tumor angiogenesis: causes, consequences,  
518 challenges and opportunities. *Cell. Mol. Life Sci*. **77**, 1745–1770 (2020).
- 519 24. W. Jian, Z. Zhang, S. Chu, Y. Peng, N. Chen, Potential roles of brain barrier dysfunctions in  
520 the early stage of Alzheimer’s disease. *Brain Research Bulletin*. **142**, 360–367 (2018).
- 521 25. T. Licht, E. Keshet, Delineating multiple functions of VEGF-A in the adult brain. *Cell. Mol.*  
522 *Life Sci*. **70**, 1727–1737 (2013).

- 523 26. S. Pasquin, M. Sharma, J.-F. Gauchat, Ciliary neurotrophic factor (CNTF): New facets of an  
524 old molecule for treating neurodegenerative and metabolic syndrome pathologies. *Cytokine*  
525 *& Growth Factor Reviews*. **26**, 507–515 (2015).
- 526 27. M. Amidfar, J. de Oliveira, E. Kucharska, J. Budni, Y.-K. Kim, The role of CREB and  
527 BDNF in neurobiology and treatment of Alzheimer’s disease. *Life Sciences*. **257**, 118020  
528 (2020).
- 529 28. W. Z. Eu, Y.-J. Chen, W.-T. Chen, K.-Y. Wu, C.-Y. Tsai, S.-J. Cheng, R. N. Carter, G.-J.  
530 Huang, The effect of nerve growth factor on supporting spatial memory depends upon  
531 hippocampal cholinergic innervation. *Transl Psychiatry*. **11**, 1–13 (2021).
- 532 29. H. Ikeshima-Kataoka, C. Sugimoto, T. Tsubokawa, Integrin Signaling in the Central  
533 Nervous System in Animals and Human Brain Diseases. *International Journal of Molecular*  
534 *Sciences*. **23**, 1435 (2022).
- 535 30. Y. Zhou, J. Xu, Y. Hou, J. B. Leverenz, A. Kallianpur, R. Mehra, Y. Liu, H. Yu, A. A.  
536 Pieper, L. Jehi, F. Cheng, Network medicine links SARS-CoV-2/COVID-19 infection to  
537 brain microvascular injury and neuroinflammation in dementia-like cognitive impairment.  
538 *Alz Res Therapy*. **13**, 110 (2021).
- 539 31. A. R. Tröscher, I. Wimmer, L. Quemada-Garrido, U. Köck, D. Gessl, S. G. S. Verberk, B.  
540 Martin, H. Lassmann, C. G. Bien, J. Bauer, Microglial nodules provide the environment for  
541 pathogenic T cells in human encephalitis. *Acta Neuropathol*. **137**, 619–635 (2019).
- 542 32. T. Fischer-Smith, S. Croul, A. E. Sverstiuk, C. Capini, D. L’Heureux, E. G. Régulier, M. W.  
543 Richardson, S. Amini, S. Morgello, K. Khalili, J. Rappaport, CNS invasion by  
544 CD14+/CD16+ peripheral blood-derived monocytes in HIV dementia: perivascular  
545 accumulation and reservoir of HIV infection. *Journal of NeuroVirology*. **7**, 528–541 (2001).

- 546 33. L. Wang, P. B. Davis, N. D. Volkow, N. A. Berger, D. C. Kaelber, R. Xu, Association of  
547 COVID-19 with New-Onset Alzheimer's Disease. *Journal of Alzheimer's Disease*. **89**, 411–  
548 414 (2022).
- 549 34. I. Rutkai, M. G. Mayer, L. M. Hellmers, B. Ning, Z. Huang, C. J. Monjure, C. Coyne, R.  
550 Silvestri, N. Golden, K. Hensley, K. Chandler, G. Lehmicke, G. J. Bix, N. J. Maness, K.  
551 Russell-Lodrigue, T. Y. Hu, C. J. Roy, R. V. Blair, R. Bohm, L. A. Doyle-Meyers, J.  
552 Rappaport, T. Fischer, Neuropathology and virus in brain of SARS-CoV-2 infected non-  
553 human primates. *Nat Commun*. **13**, 1745 (2022).
- 554 35. M. Patarroyo, J. Prieto, J. Rincon, T. Timonen, C. Lundberg, L. Lindbom, B. Asjo, C. G.  
555 Gahmbekg, Leukocyte-Cell Adhesion: A Molecular Process Fundamental in Leukocyte  
556 Physiology. *Immunological Reviews*. **114**, 67–108 (1990).
- 557 36. T. M. Bui, H. L. Wiesolek, R. Sumagin, ICAM-1: A master regulator of cellular responses in  
558 inflammation, injury resolution, and tumorigenesis. *Journal of Leukocyte Biology*. **108**, 787–  
559 799 (2020).
- 560 37. G. E. Serrano, J. E. Walker, R. Arce, M. J. Glass, D. Vargas, L. I. Sue, A. J. Intorcica, C. M.  
561 Nelson, J. Oliver, J. Papa, A. Russell, K. E. Suszczewicz, C. I. Borja, C. Belden, D.  
562 Goldfarb, D. Shprecher, A. Atri, C. H. Adler, H. A. Shill, E. Driver-Dunckley, S. H. Mehta,  
563 B. Readhead, M. J. Huentelman, J. L. Peters, E. Alevritis, C. Bimi, J. P. Mizgerd, E. M.  
564 Reiman, T. J. Montine, M. Desforages, J. L. Zehnder, M. K. Sahoo, H. Zhang, D. Solis, B. A.  
565 Pinsky, M. Deture, D. W. Dickson, T. G. Beach, *medRxiv*, in press,  
566 doi:10.1101/2021.02.15.21251511.



- 567 38. S. M. Burks, H. Rosas-Hernandez, M. Alejandro Ramirez-Lee, E. Cuevas, J. C. Talpos, Can  
568 SARS-CoV-2 infect the central nervous system via the olfactory bulb or the blood-brain  
569 barrier? *Brain, Behavior, and Immunity*. **95**, 7–14 (2021).
- 570 39. R. M. Parodi-Rullán, S. Javadov, S. Fossati, Dissecting the Crosstalk between Endothelial  
571 Mitochondrial Damage, Vascular Inflammation, and Neurodegeneration in Cerebral  
572 Amyloid Angiopathy and Alzheimer’s Disease. *Cells*. **10**, 2903 (2021).
- 573 40. P. Xu, Y. Hong, Y. Xie, K. Yuan, J. Li, R. Sun, X. Zhang, X. Shi, R. Li, J. Wu, X. Liu, W.  
574 Hu, W. Sun, TREM-1 Exacerbates Neuroinflammatory Injury via NLRP3 Inflammasome-  
575 Mediated Pyroptosis in Experimental Subarachnoid Hemorrhage. *Transl. Stroke Res*. **12**,  
576 643–659 (2021).
- 577 41. J. D. Lünemann, S. Malhotra, M. L. Shinohara, X. Montalban, M. Comabella, Targeting  
578 Inflammasomes to Treat Neurological Diseases. *Annals of Neurology*. **90**, 177–188 (2021).
- 579 42. F. J. Herman, G. M. Pasinetti, Principles of inflammasome priming and inhibition:  
580 Implications for psychiatric disorders. *Brain Behav Immun*. **73**, 66–84 (2018).
- 581 43. G. R. Campbell, R. K. To, J. Hanna, S. A. Spector, SARS-CoV-2, SARS-CoV-1, and HIV-1  
582 derived ssRNA sequences activate the NLRP3 inflammasome in human macrophages  
583 through a non-classical pathway. *iScience*. **24**, 102295 (2021).
- 584 44. R. C. Smail, B. J. Brew, HIV-associated neurocognitive disorder. *Handb Clin Neurol*. **152**,  
585 75–97 (2018).
- 586 45. X. Sun, H. Zhang, D. Yao, Y. Xu, Q. Jing, S. Cao, L. Tian, C. Li, Integrated Bioinformatics  
587 Analysis Identifies Hub Genes Associated with Viral Infection and Alzheimer’s Disease.  
588 *Journal of Alzheimer’s Disease*. **85**, 1053–1061 (2022).

- 589 46. E. Tavazzi, D. Morrison, P. Sullivan, S. Morgello, T. Fischer, Brain inflammation is a  
590 common feature of HIV-infected patients without HIV encephalitis or productive brain  
591 infection. *Curr HIV Res.* **12**, 97–110 (2014).
- 592 47. H. Varet, L. Brillet-Guéguen, J.-Y. Coppée, M.-A. Dillies, SARTools: A DESeq2- and  
593 EdgeR-Based R Pipeline for Comprehensive Differential Analysis of RNA-Seq Data. *PLOS*  
594 *ONE.* **11**, e0157022 (2016).
- 595 48. A. Krämer, J. Green, J. Pollard Jr, S. Tugendreich, Causal analysis approaches in Ingenuity  
596 Pathway Analysis. *Bioinformatics.* **30**, 523–530 (2014).
- 597 49. R. Edgar, M. Domrachev, A. E. Lash, Gene Expression Omnibus: NCBI gene expression  
598 and hybridization array data repository. *Nucleic Acids Res.* **30**, 207–210 (2002).

599

600

601 **Acknowledgments**

602 The authors thank the Neuropathology Brain Bank and Research CoRE of the Icahn  
603 School of Medicine at Mount Sinai for postmortem samples.

604

605 **Funding:**

606 The research was supported by Unrestricted Funds and Altschul Foundation (GMP)  
607 National Institutes of Health Office of Research Infrastructure Programs grant  
608 P51OD011110 (TF)

609 The content is solely the responsibility of the authors and does not necessarily represent  
610 the official views of the National Institutes of Health and Veteran Administration

611

612 **Author contributions:**

613 Conceptualization: EG, GMP

614 Methodology: EG, TF, GP

615 Investigation: EG, KT, SN, LH, ME, GH, BM, NJ, TF

616 Visualization: EG, ME, LS, LH, TF

617 Supervision: TF, GMP

618 Writing—original draft: EG, ME, TF

619 Writing—review & editing: EG, SN, NJ, TF, GMP

620

621 **Competing interests:** NJ receives grant funding paid to her institution from NINDS

622 (NIH U24NS107201, NIH IU54NS100064, 3R01CA202911-05S1, R21NS122389,

623 R01HL161847). Some of these grants are COVID-19 related but focus on the

624 neuroimaging findings. The other authors declare that they have no conflict of interest

625 with the contents of this article.

626

627

**Data and materials availability:** The authors declare that the data supporting the findings

628

of this study are available within the paper and its supplementary information files. The

629

raw data discussed in this publication will be accessible through NCBI's Gene Expression

630

Ominibus (GEO) upon publication (49).

631 **Figures and Tables**

632

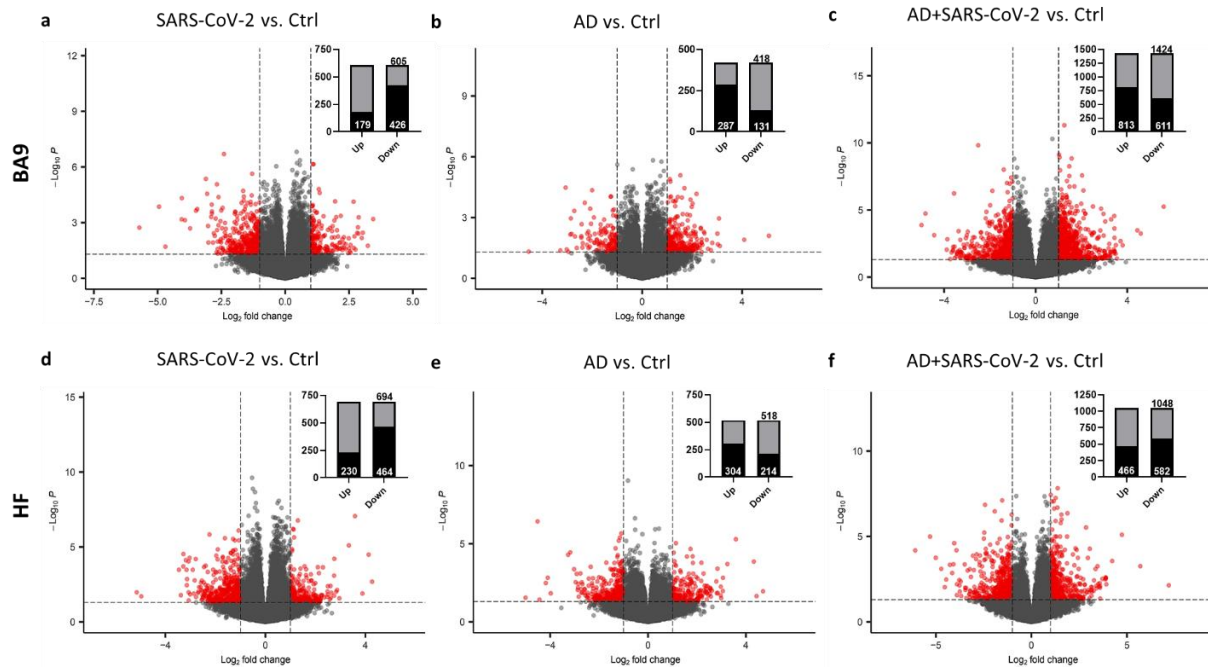

633

634 **Fig. 1. Gene expression in cortical BA9 and HF tissue.**

635 Volcano plot distribution of gene transcripts of the cortical BA9 region in as shown in **A**,  
636 SARS-CoV-2 cases, in **B**, AD cases, and in **C**, SARS-CoV-2 infected AD cases compared  
637 to neurological control cases. The HF region in panels **D**, SARS-CoV-2 cases, **E**, AD  
638 cases, and **F** SARS-CoV-2 infected AD cases compared to neurological control cases.  
639 Volcano plots were generated from 39,901 genes in A, B, D and E, and 38,021 genes in C  
640 35,527 genes in F. Transcripts with nominal  $p < 0.01$  and an absolute log fold-change  
641 (logFC) greater than 1 are indicated in red and shown in inlayed bar graphs wherein the  
642 number of upregulated and downregulated genes are indicated in black as part of the total  
643 of differentially regulated genes (grey).

644

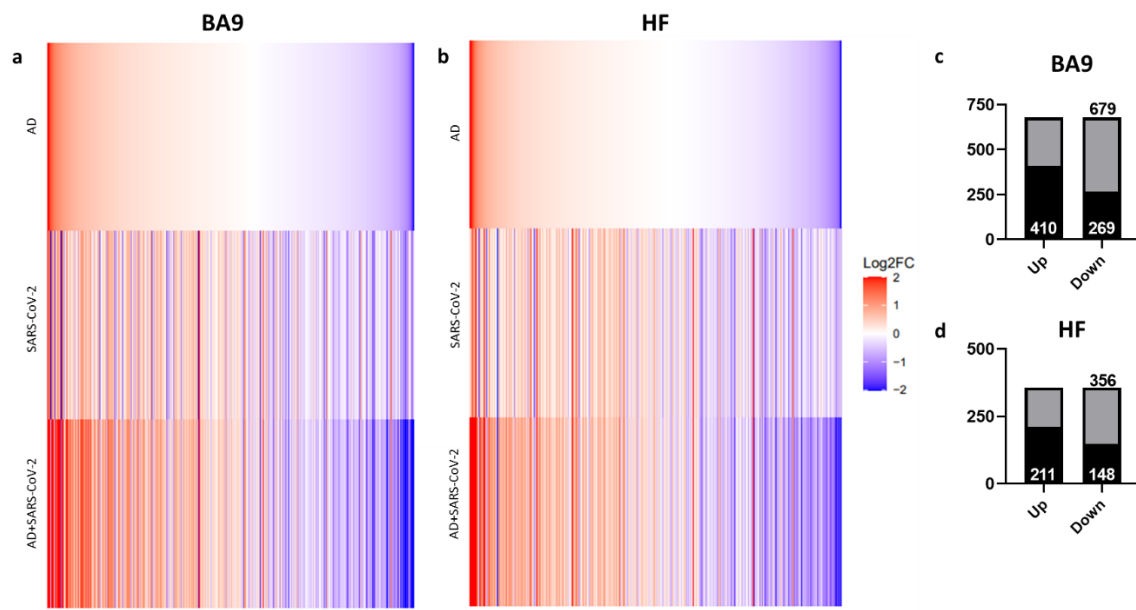

645

646

647

648

649

650

651

652

653

654

655

656

657

**Fig. 2. Similarity of gene expression in cortical BA9 and HF tissue in SARS-CoV-2 and SARS-CoV-2 infected AD relative to AD individuals based on log<sub>2</sub>FC.**

Genes known to be differentially expressed due to either SARS-CoV-2 infection or AD were examined with respect to their gene expression changes, with the given gene set being selected for cortical BA9, shown in panel **A**, or HF, shown in panel **B**. The log<sub>2</sub>FC of the genes for three individual differential comparisons (AD versus Control, SARS-CoV-2 versus Control, and SARS-CoV-2 infected AD versus Control) are shown for the BA9 and HF tissue as shown in panels **A** and **B**, respectively. Then, using Ingenuity pathway analysis (IPA) as a filtering system for genes within the database, we compared the similarity in expression of genes present in all datasets (SARS-CoV-2, AD and SARS-CoV-2 infected AD cases), shown in panel **C** and **D**, in both the cortical BA9 and HF.

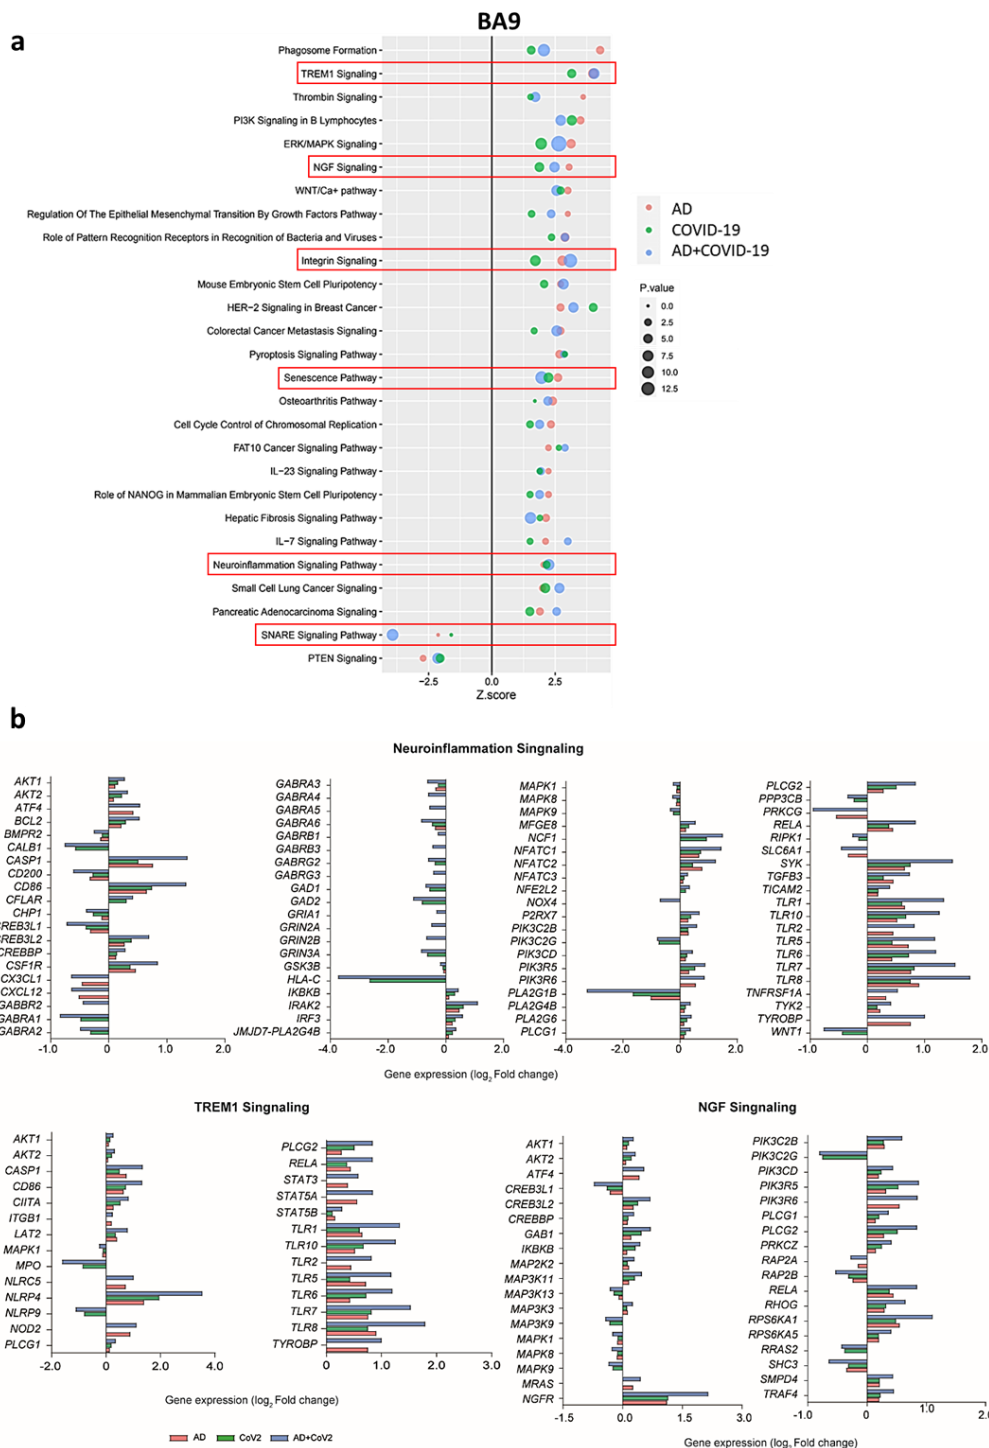

**Fig. 3. Changes in Signaling Pathways within the cortical BA9.**

Canonical Pathway Similarities as seen in panel A, show top regulated canonical pathways within the cortical BA9 in SARS-CoV-2, AD, and SARS-CoV-2 infected AD cases in reference to the control. Activation score (Z-score) is shown on the X-axis, while the pathways are indicated on the Y-axis. The color of the points indicates the IPA comparison, while the size of the point represents the  $-\log_{10}$  p-value of the IPA comparison, with the larger points indicating the lowest p-values. The predicted gene regulation of the Neuroinflammation, TREM1 and NGF pathways, shown in panel B, indicate that SARS-CoV-2, AD and SARS-CoV-2 infected AD groups have similar expression in key inflammatory and neuronal pathways.

658

659

660

661

662

663

664

665

666

667

668

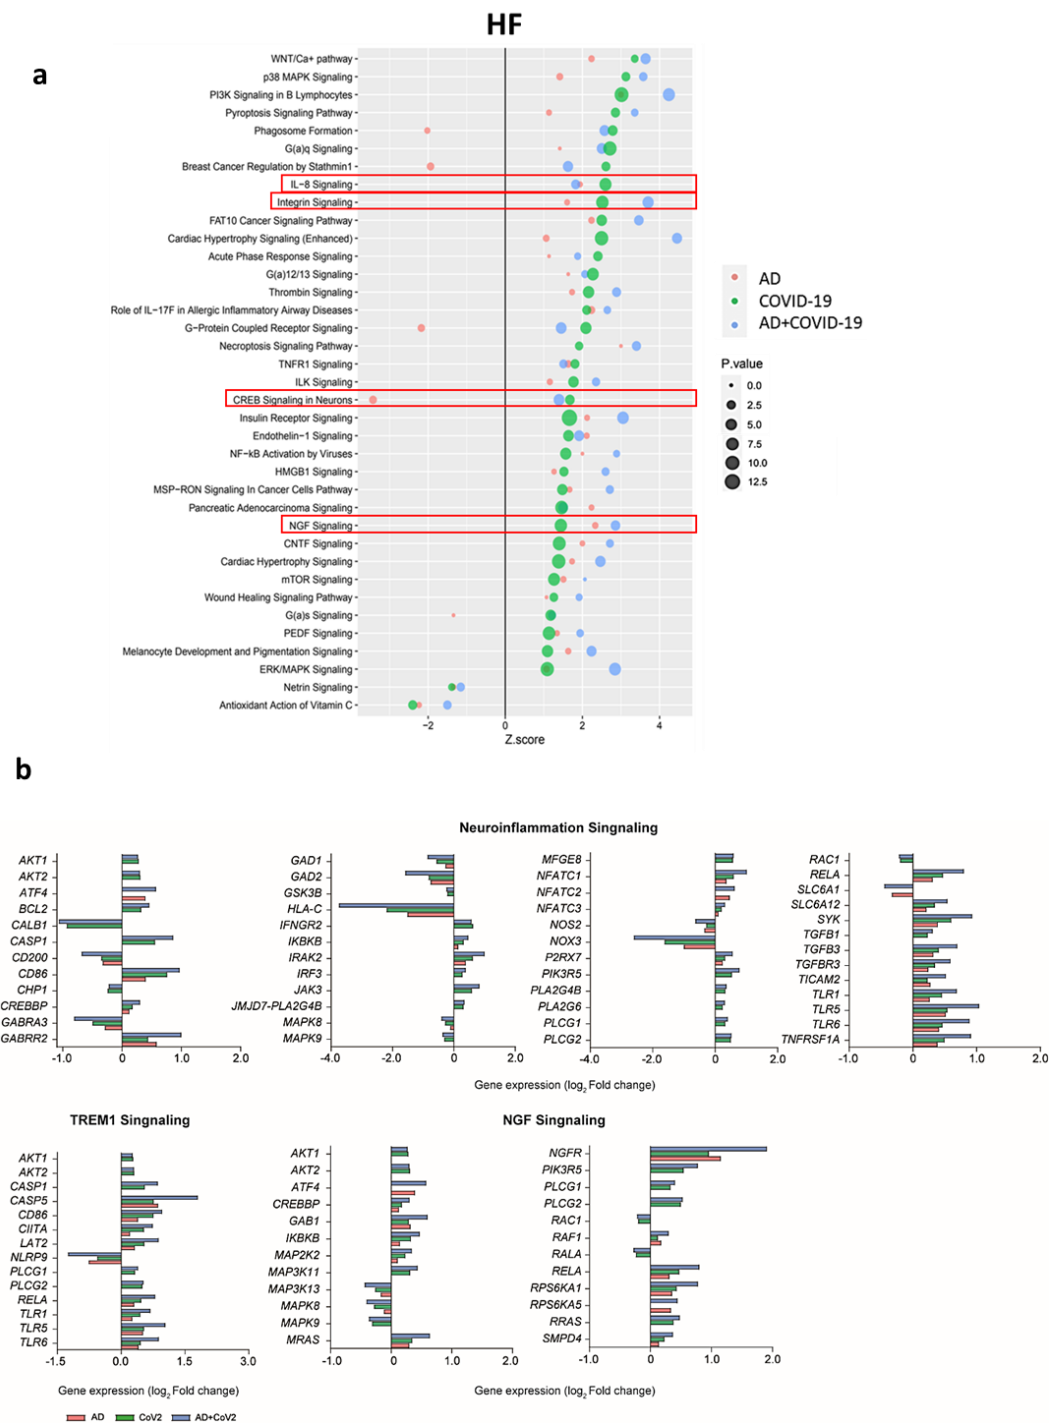

**Fig. 4. Changes in Signaling Pathways within the HF.**

Canonical pathway similarities as seen in panel A, top regulated canonical pathways were compared within the HF in SARS-CoV-2, AD, and SARS-CoV-2 infected AD cases in reference to the control. Activation score (Z-score) is shown on the X-axis, while the pathways are indicated on the Y-axis. The color of the points indicates the IPA comparison, while the size of the point represents the  $-\log_{10}$  p-value of the IPA comparison, with the larger points indicating the lowest p-values. The predicted gene regulation of the Neuroinflammation, TREM1 and NGF pathways, shown in panel B, indicate that SARS-CoV-2, AD and SARS-CoV-2 infected AD groups have similar expression in key inflammatory and neuronal pathways.

669

670

671

672

673

674

675

676

677

678

679



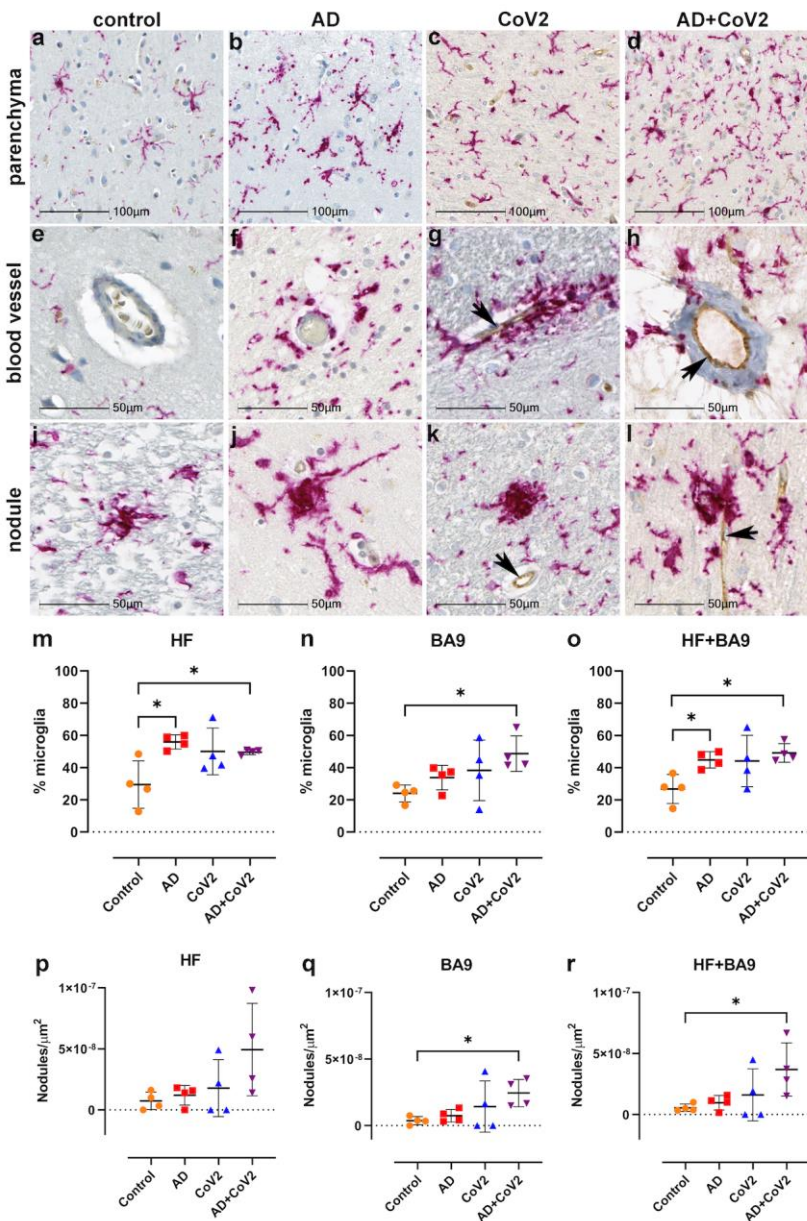

**Fig. 5. Microgliosis and nodular lesions in neurological controls, SARS-CoV-2, AD and SARS-CoV-2 infected individuals.**

The level of microglial activation was assessed by immunohistochemical staining using anti-Iba-1 antibody with Vector Red. The presence of SARS-CoV-2 was assessed using an antibody against the virus nucleocapsid and visualized with DAB. Parenchymal microglia are more frequent and highly activated in the context of infection with and without AD, as shown by thickened processes, enlarged soma, and loss of individual cellular domain in panels **B-D**, as compared to age-matched controls shown in **A and E**. When present, SARS-CoV-2 localizes to the blood vessel endothelium shown in panels **G, H, K, L** (black arrows). Microglia appear to gather around blood vessels in disease but do not form cuffs (**F, G, H**). Nodular lesions are seen in most cases assessed, regardless of disease status (**I-L**), however, they appear larger and more frequent in the context of disease shown in panels **J-L**, as compared to controls, panel **I**. A multiplex algorithm was used to count all cells, using DAPI+ nuclei, with HALO and calculate percent frequency of Iba-1+ microglia, shown in panels **M-O**. There was upregulation of Iba-1 in the hippocampus as compared to the cortical BA9 region for most cases, though there is a significantly higher ratio of microglia relative to other cells when comparing the AD and SARS-CoV-2 infected AD cases to

697 the control group shown in panel **M**. This trend seems to hold true for cortical BA9 region as  
698 well, where the only groups with a significant difference in microglia ratios are the control and  
699 SARS-CoV-2 infected AD cases shown in panel **N**. When all cases have both regions averaged,  
700 the level of microgliosis is shown to be higher in the AD and SARS-CoV-2 infected AD cases  
701 when compared to control in panel **O**. Graphs **P-R** show the normalized counts of microglial  
702 nodule frequency. A higher frequency of nodules is seen in the HF, however, the difference  
703 between groups did not reach statistical significance as shown in panel **P**. In contrast, fewer  
704 nodules are seen in cortical BA9, overall. A statistically significant higher number of lesions are  
705 seen in SARS-CoV-2 infected AD cases, as compared to control cortical BA9, suggesting greater  
706 inflammation in the cortical BA9 of patients with both AD and SARS-CoV-2 infection, shown in  
707 panel **Q**. Significance was maintained between the control and SARS-CoV-2 infected AD groups  
708 when the average was taken for both brain regions per case shown in panel **R**. Statistics were  
709 performed with a two-tailed Mann-Whitney U test. \* $p < 0.05$ . Data are expressed as mean  $\pm$  SEM.  
710

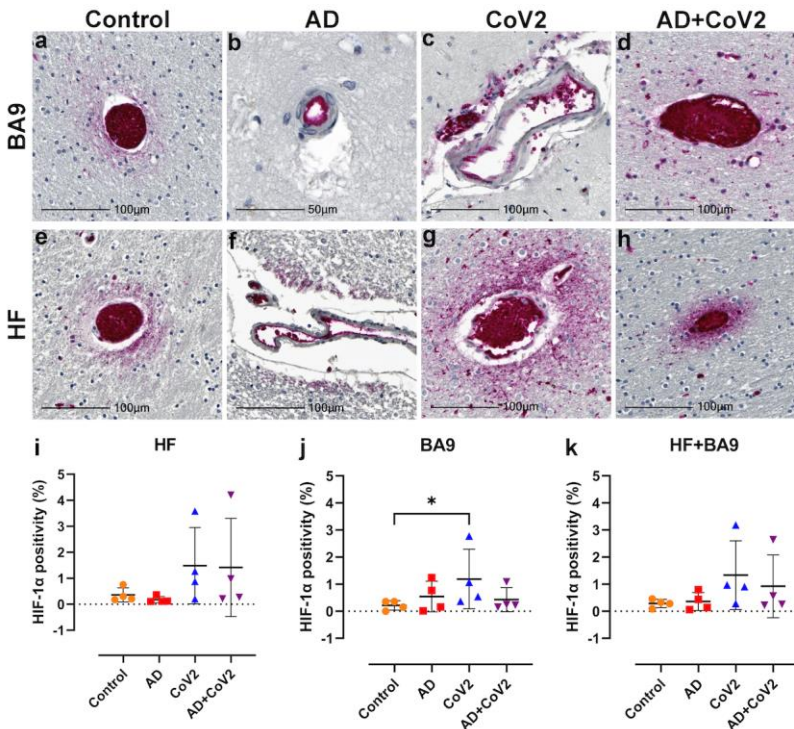

711

712 **Fig. 6. Hypoxia-inducible factor-1 alpha subunit (HIF-1 $\alpha$ ) in neurological controls, SARS-**  
713 **CoV-2, AD and SARS-CoV-2 infected individuals.**

714 Representative images demonstrate HIF-1 $\alpha$  immunopositivity around the vasculature that extends  
715 into the parenchyma in brain of patients with SARS-CoV-2 infection, regardless of AD status  
716 shown in panels **C, D, G, H**. Comparatively, this is seen less frequently and does not extend  
717 significantly into the parenchyma in brain of age-matched controls, shown in panels **A and E**. In  
718 AD only, positivity was most often observed in epithelium with no or minimal extension into the  
719 brain parenchyma as shown in panels **B and F**. Graphs show the total percentage of tissue  
720 positive for HIF-1 $\alpha$ , as defined using a HALO area algorithm for detection of Vector Red  
721 intensity over the whole section shown (**I-K**). Although statistical significance between groups  
722 was not reached in the HF or averaged group comparisons, increased HIF-1 $\alpha$  expression is seen  
723 in the SARS-CoV-2 infected patients, with and without AD, as compared to age-matched controls  
724 in panels **I and K**. An increase in area positivity is seen in all groups in the cortical BA9 region,  
725 as compared to non-affected controls, however, statistical significance is only seen with the  
726 SARS-CoV-2 group in panel **J**. Statistics were performed with a two-tailed Mann-Whitney U test.  
727 \* $p < 0.05$ . Data are expressed as mean  $\pm$  SEM.

728
